# Supplementary material for: Chiroptical switching behavior of heteroleptic ruthenium complexes bearing acetylacetonato and tropolonato ligands
Source: Royal Society of Chemistry journal article supplement (doi:10.1039/d1dt02592a), 2021-01-01
Supplement: d1dt02592a1.pdf [file d1dt02592a1.pdf]

## Chiroptical switching behavior of heteroleptic ruthenium complexes bearing acetylacetonato and tropolonato ligands

Jun Yoshida,<sup>[a]\*</sup> Kana Yamazaki,<sup>[b]</sup> Kazunori Tateyama,<sup>[b]</sup> Hidetaka Yuge,<sup>[b]</sup> and Hisako Sato<sup>[c]</sup>

JY: yoshida.jun@nihon-u.ac.jp

a) Department of Chemistry, College of Humanities & Sciences, Nihon University, 3-25-40 Sakurajosui, Setagaya-ku, Tokyo 156-8550, Japan

b) Department of Chemistry, School of Science, Kitasato University, 1-15-1 Kitasato Minami-ku, Sagamihara, 252-0373, Japan

c) Graduate School of Science and Engineering, Ehime University, 2-5 Bunkyo-chou, Matsuyama, Ehime 790-8577, Japan.

# ESI-MS spectrum

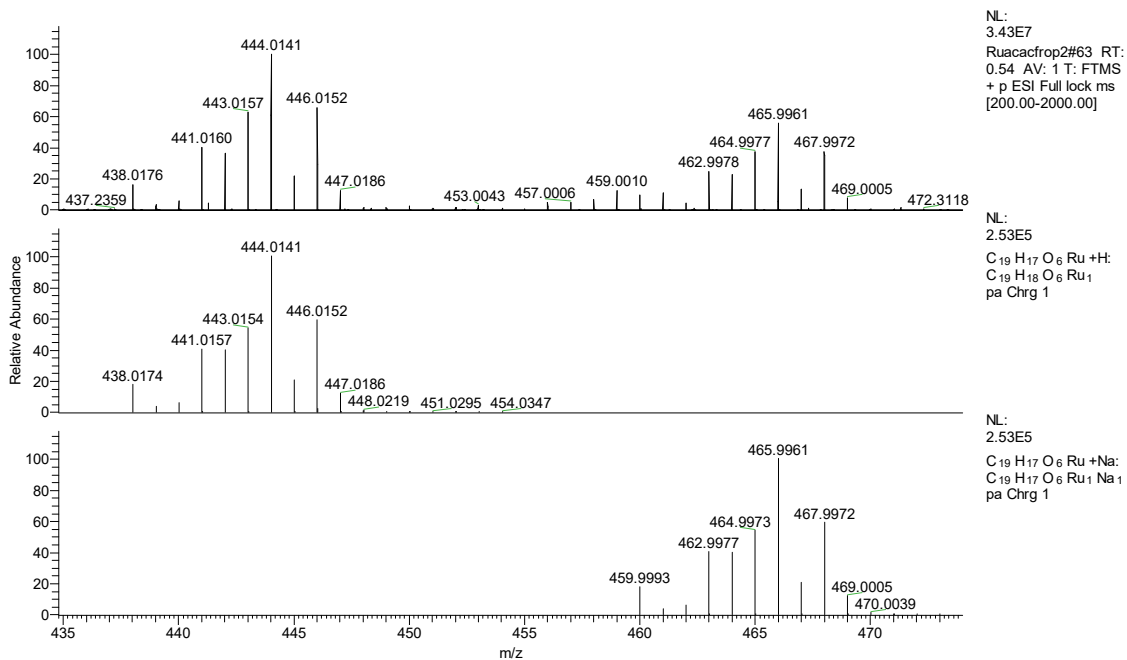

**Figure S1** Experimental isotropic pattern of **Ru-2** (top) and theoretical isotopic patterns for  $[C_{19}H_{17}O_6Ru+H]^+$  (middle) and  $[C_{19}H_{17}O_6Ru+Na]^+$  (bottom).

## HPLC charts

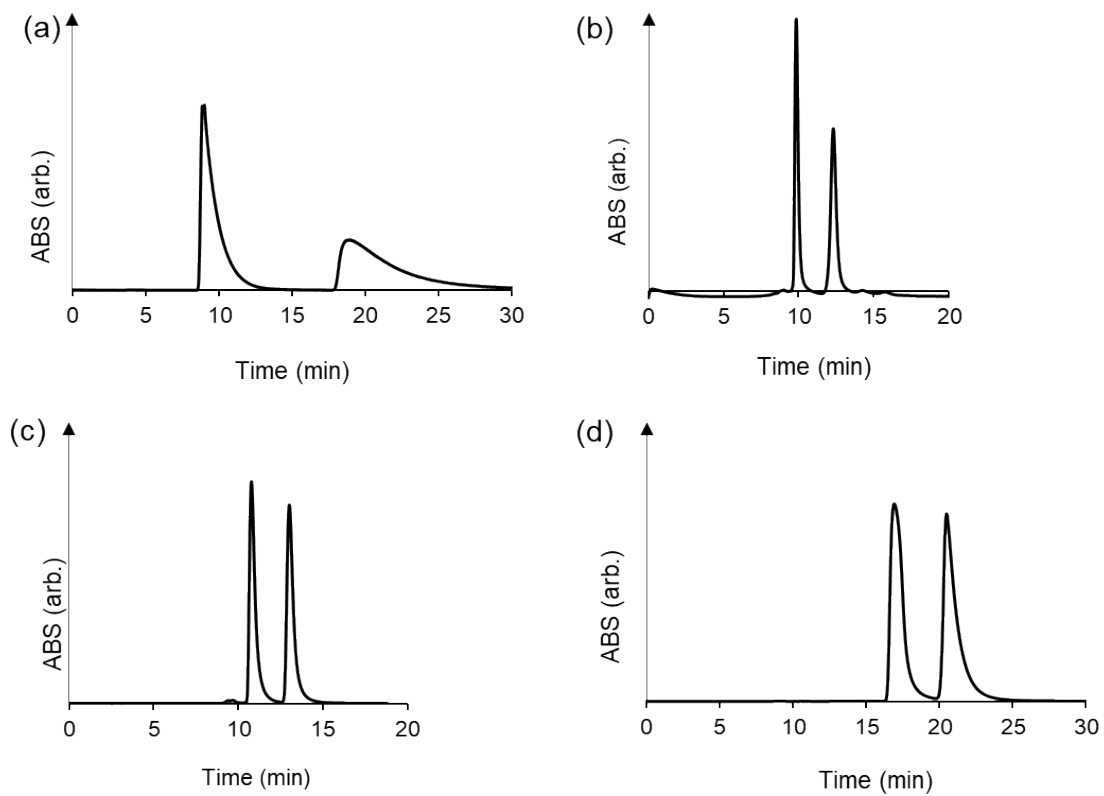

**Figure S2** The HPLC chromatograms of (a) **Ru-0**, (b) **Ru-1**, (c) **Ru-2**, and (d) **Ru-3** obtained in the following conditions; (a) RU-1 column (Shiseido Corp., Japan), methanol, flow rate = 1 ml min<sup>-1</sup>, (b, c) CHIRALPAK-IA column (Daicel Chemical Industries Co., Ltd. Japan), chloroform/hexane = 2/1 (v/v), flow rate = 6 ml min<sup>-1</sup>, and (d) CHIRALPAK-IA column, chloroform/hexane = 3/2 (v/v), flow rate = 6 ml min<sup>-1</sup>.

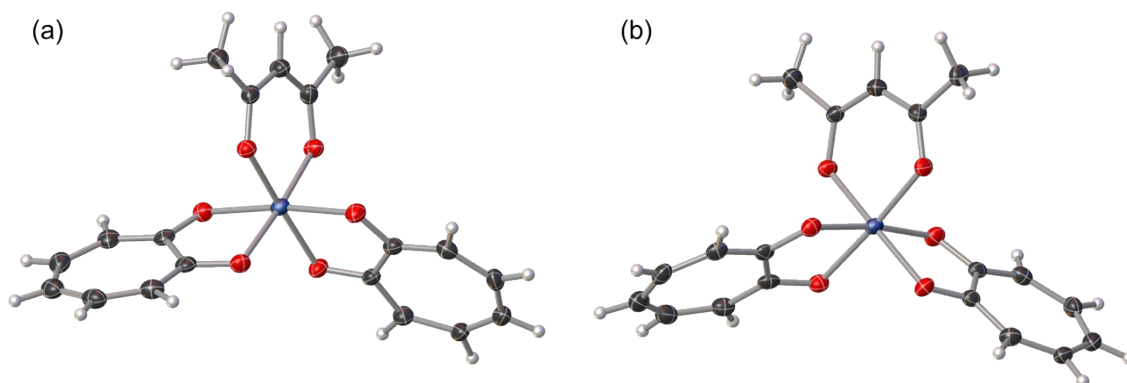

Figure S3 ORTEP representations of (a)  $\Delta$ -**Ru-2** and (b)  $\Lambda$ -**Ru-2** (50% probability level), which correspond to 2<sup>nd</sup> and 1<sup>st</sup> fractions in the HPLC chromatogram.

Table S1 Crystallographic and experimental data for  $\Delta$ - and  $\Lambda$ -**Ru-2** (CCDC 2099739 and 2099741).

| Compound                                                                   | $\Delta$ - <b>Ru-2</b>                            | $\Lambda$ - <b>Ru-2</b>                           |
|----------------------------------------------------------------------------|---------------------------------------------------|---------------------------------------------------|
| Formula                                                                    | C <sub>19</sub> H <sub>17</sub> O <sub>6</sub> Ru | C <sub>19</sub> H <sub>17</sub> O <sub>6</sub> Ru |
| Formula weight                                                             | 442.39                                            | 442.39                                            |
| $D_{\text{calc.}} / \text{g cm}^{-3}$                                      | 1.701                                             | 1.700                                             |
| $\mu / \text{mm}^{-1}$                                                     | 7.649                                             | 7.648                                             |
| Size / mm <sup>3</sup>                                                     | 0.13×0.10×0.07                                    | 0.047×0.038×0.02                                  |
| T / K                                                                      | 100(2)                                            | 100(2)                                            |
| Crystal system                                                             | Monoclinic                                        | Monoclinic                                        |
| Flack Parameter                                                            | -0.014(5)                                         | -0.019(5)                                         |
| Hooft Parameter                                                            | -0.022(4)                                         | -0.024(4)                                         |
| Space group                                                                | $C_2$                                             | $C_2$                                             |
| $a / \text{\AA}$                                                           | 28.6206(4)                                        | 28.5743(4)                                        |
| $b / \text{\AA}$                                                           | 7.38672(13)                                       | 7.3986(1)                                         |
| $c / \text{\AA}$                                                           | 8.17443(13)                                       | 8.1753(1)                                         |
| $\alpha / ^\circ$                                                          | 90                                                | 90                                                |
| $\beta / ^\circ$                                                           | 91.0315(15)                                       | 90.911(1)                                         |
| $\gamma / ^\circ$                                                          | 90                                                | 90                                                |
| $V / \text{\AA}^3$                                                         | 1727.90(5)                                        | 1728.12(4)                                        |
| Z                                                                          | 4                                                 | 4                                                 |
| Wavelength/ $\text{\AA}$                                                   | 1.54184                                           | 1.54184                                           |
| Radiation type                                                             | CuK $\alpha$                                      | CuK $\alpha$                                      |
| No. of measured, independent and observed [ $I > 2\sigma(I)$ ] reflections | 10058, 3444, 3421                                 | 9684, 3411, 3316                                  |
| $R_{\text{int}}$                                                           | 0.027                                             | 0.027                                             |
| No. of parameters                                                          | 238                                               | 237                                               |
| GooF                                                                       | 1.108                                             | 1.118                                             |
| $wR_2$                                                                     | 0.052                                             | 0.052                                             |
| $R_1$                                                                      | 0.020                                             | 0.020                                             |

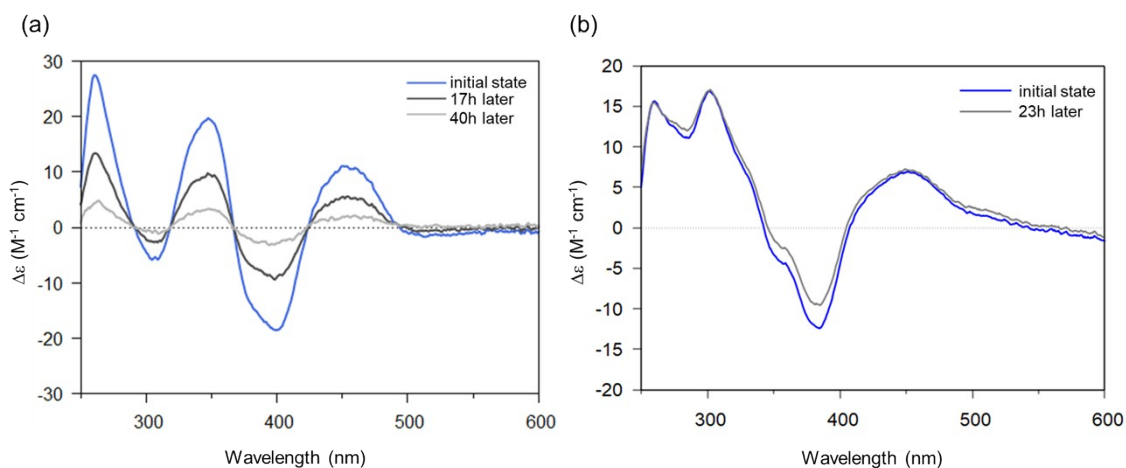

Figure S4 The time-course CD spectral changes of the acetonitrile solutions containing (a)  $[Ru(trop)_3]$  (**Ru-3**) and (b)  $[Ru(acac)(trop)_2]$  (**Ru-2**).

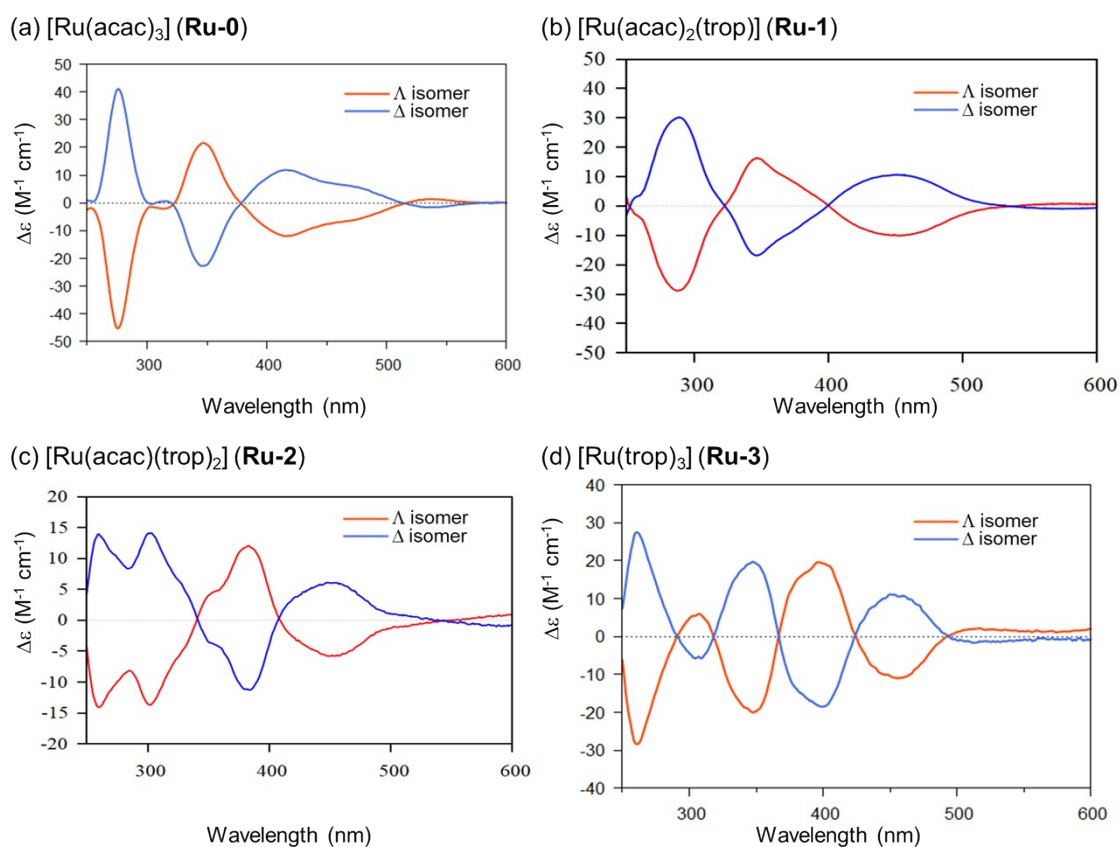

Figure S5 ECD spectra of  $\Delta$  and  $\Lambda$  isomers of **Ru-0**, **Ru-1**, **Ru-2**, and **Ru-3**. The 1<sup>st</sup> and 2<sup>nd</sup> fractions in the HPLC chromatograms of ruthenium complexes were all assigned to  $\Lambda$  and  $\Delta$  isomers, respectively.

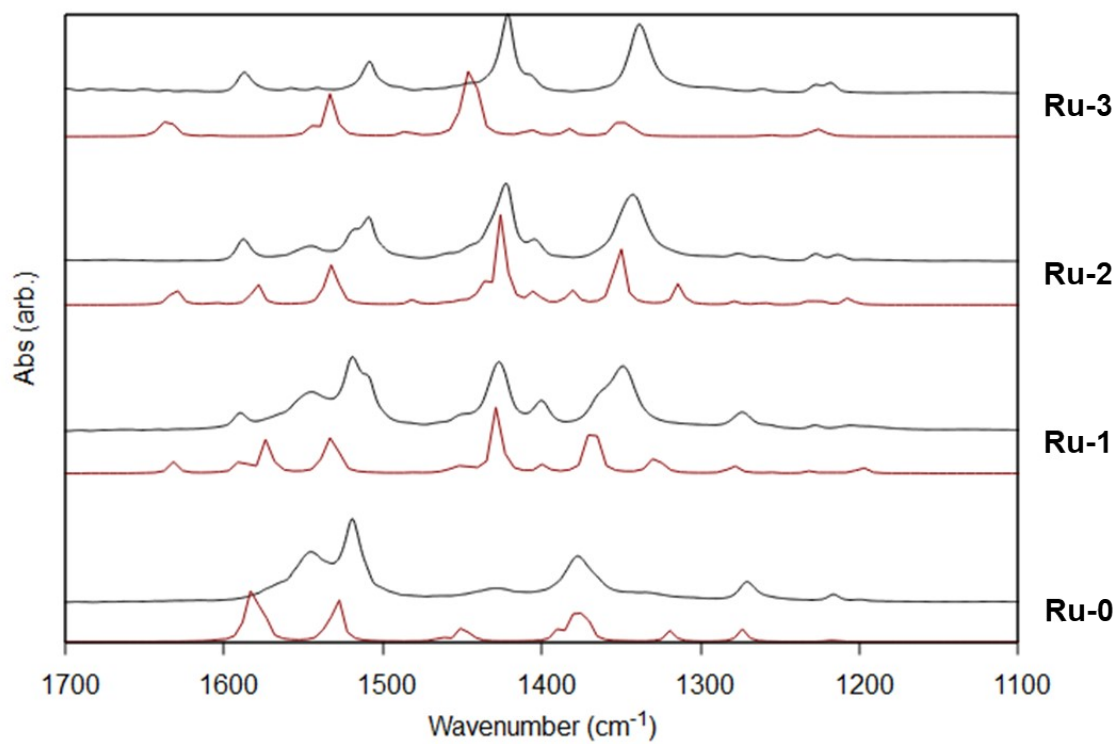

Figure S6 Experimental (black) and DFT-calculated (red) IR spectra of (a) **Ru-0**, (b) **Ru-1**, (c) **Ru-2**, and (d) **Ru-3** (Scale = 0.97 for calculated spectra).

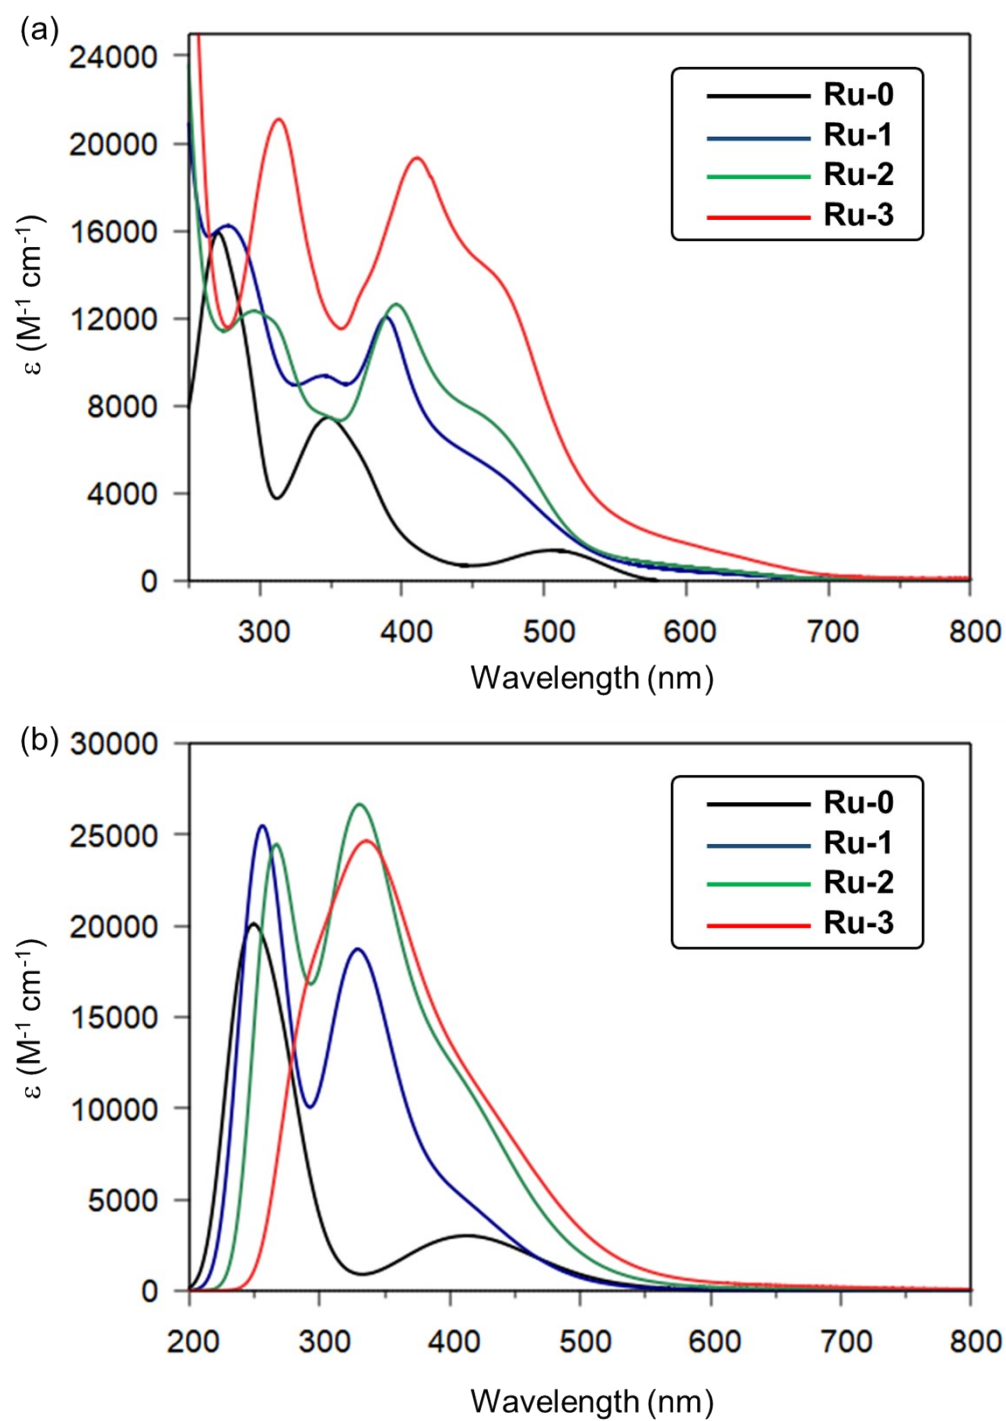

Figure S7 (a) Experimental and (b) calculated UV-vis spectra of **Ru-0**, **Ru-1**, **Ru-2**, and **Ru-3**.



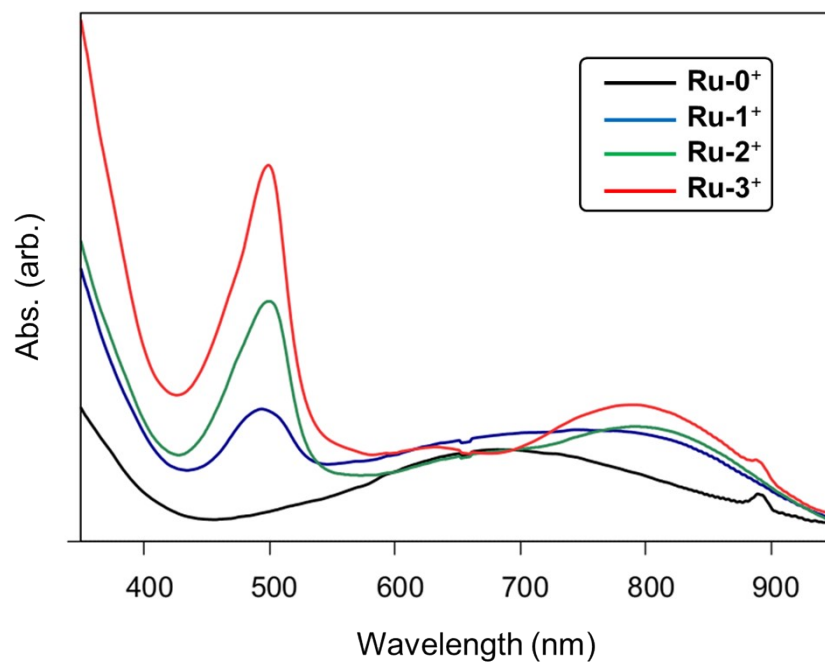

Figure S8 UV-vis spectra of **Ru-0<sup>+</sup>**, **Ru-1<sup>+</sup>**, **Ru-2<sup>+</sup>**, and **Ru-3<sup>+</sup>**, which were in-situ prepared by the addition of 1.0~2.5 equiv. of CAN to the acetonitrile solution containing each neutral complex.

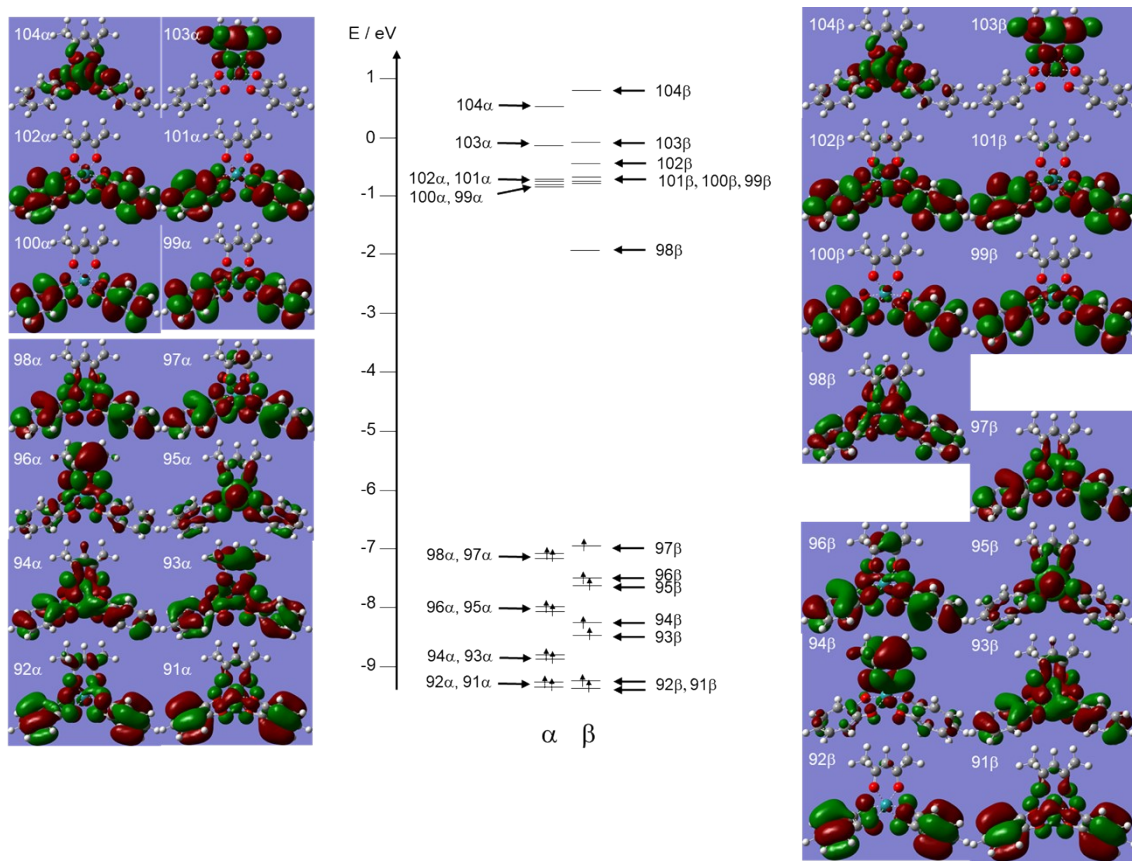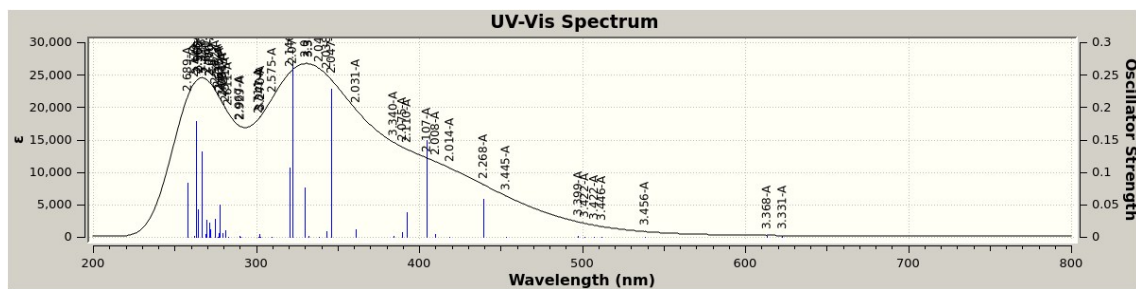

Figure S9 Frontier MO diagram and UV-vis spectrum of **Ru-2** calculated by TD-DFT/ucam-b3lyp. The HOMO(SOMO)-LUMO band gap is 4.939 eV.

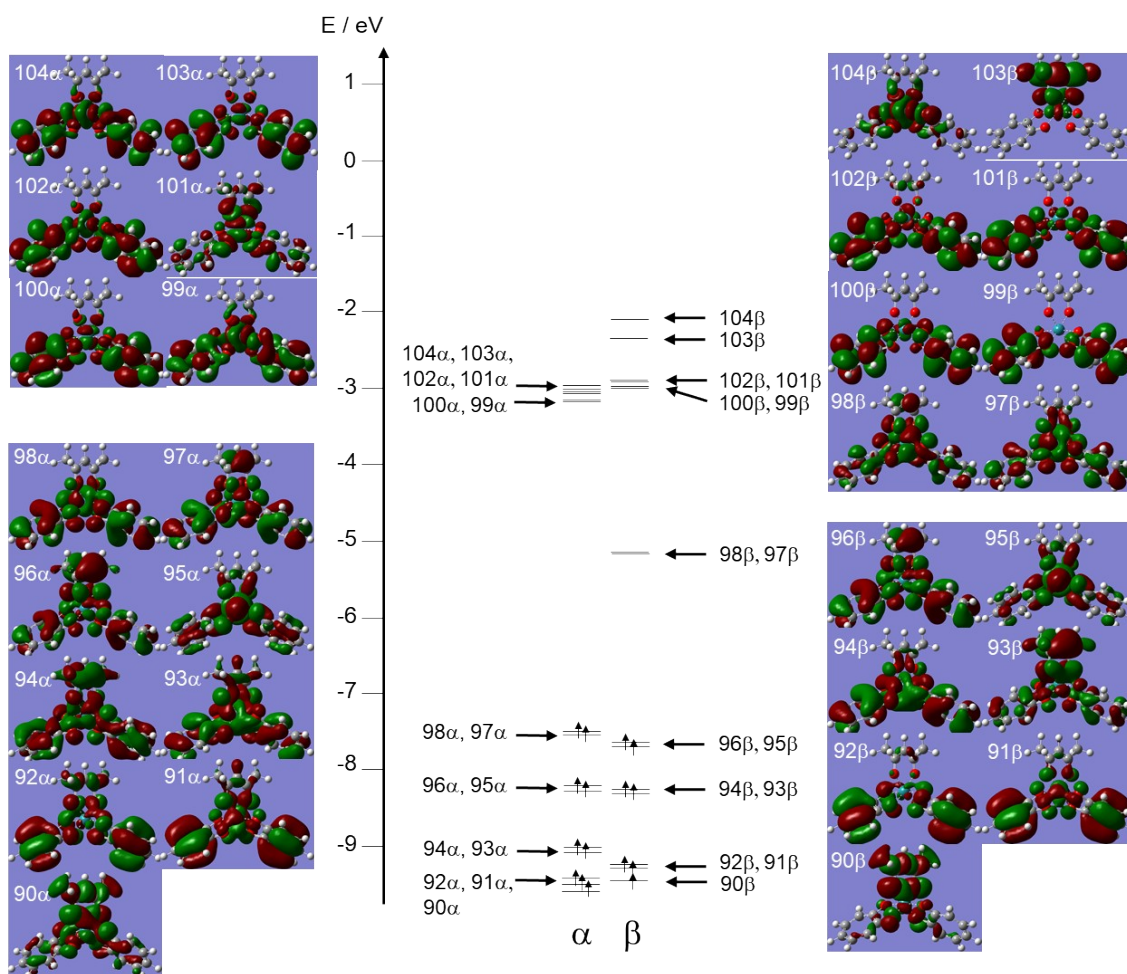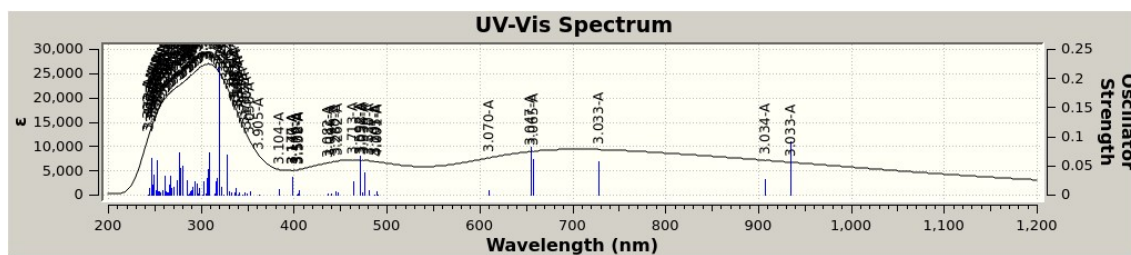

Figure S10 Frontier MO diagram and UV-vis spectrum of  $\text{Ru-2}^+$  calculated by TD-DFT/ucam-b3lyp. The HOMO(SOMO)-LUMO band gap is 2.505 eV.

Table S2 □ Part of the excitation energies and oscillator strengths obtained from the TD-DFT calculation of **Ru-2<sup>+</sup>**.

| wavelength / nm | oscillator strength (f) | excitation                                                                                                                                                 |
|-----------------|-------------------------|------------------------------------------------------------------------------------------------------------------------------------------------------------|
| 935.23          | 0.0913                  | 94 $\beta$ $\rightarrow$ 98 $\beta$ , 96 $\beta$ $\rightarrow$ 97 $\beta$                                                                                  |
| 907.66          | 0.0274                  | 94 $\beta$ $\rightarrow$ 97 $\beta$ , 96 $\beta$ $\rightarrow$ 98 $\beta$                                                                                  |
| 728.56          | 0.0564                  | 93 $\beta$ $\rightarrow$ 97 $\beta$ , 94 $\beta$ $\rightarrow$ 98 $\beta$ , 96 $\beta$ $\rightarrow$ 97 $\beta$                                            |
| 658.06          | 0.0607                  | 93 $\beta$ $\rightarrow$ 98 $\beta$ , 94 $\beta$ $\rightarrow$ 97 $\beta$ , 95 $\beta$ $\rightarrow$ 97 $\beta$ , 96 $\beta$ $\rightarrow$ 98 $\beta$      |
| 654.70          | 0.0815                  | 93 $\beta$ $\rightarrow$ 97 $\beta$ , 94 $\beta$ $\rightarrow$ 98 $\beta$                                                                                  |
| 610.11          | 0.0078                  | 97 $\alpha$ $\rightarrow$ 100 $\alpha$ , 98 $\alpha$ $\rightarrow$ 99 $\alpha$ , 93 $\beta$ $\rightarrow$ 98 $\beta$ , 94 $\beta$ $\rightarrow$ 97 $\beta$ |

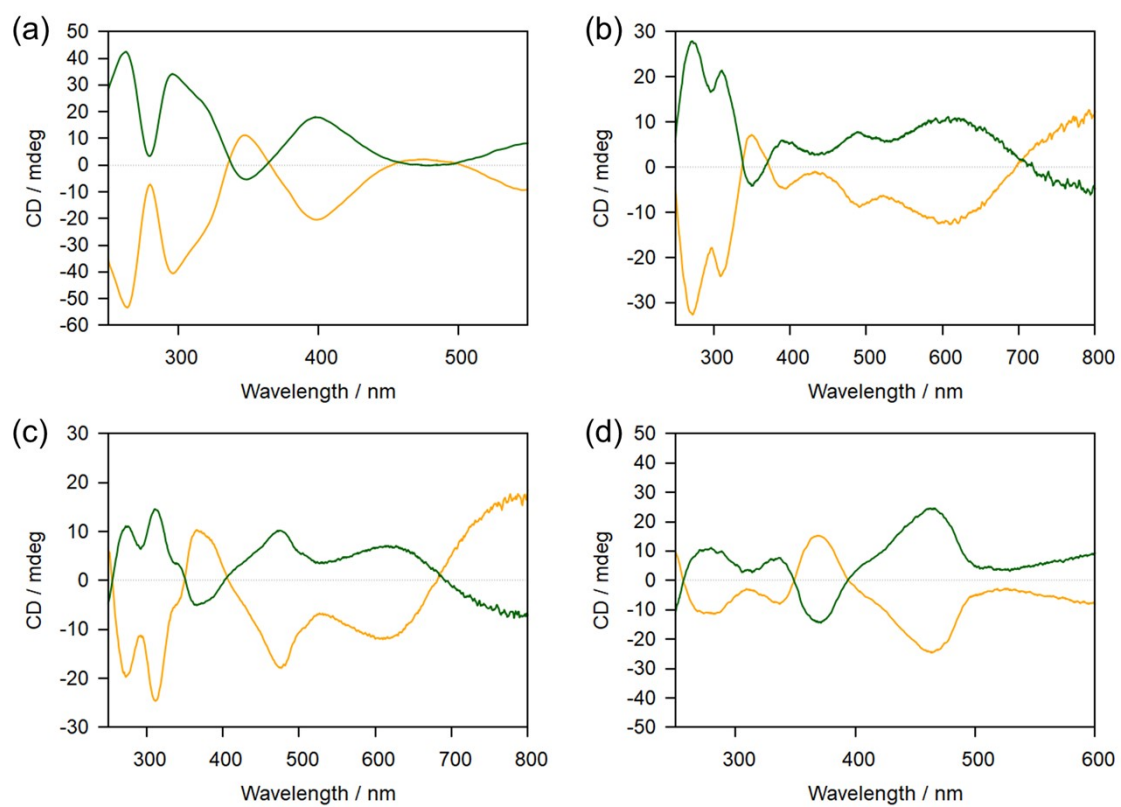

Figure S11 ECD spectra of (a) **Ru-0<sup>+</sup>**, (b) **Ru-1<sup>+</sup>**, (c) **Ru-2<sup>+</sup>**, and (d) **Ru-3<sup>+</sup>**, which were in-situ oxidized by the addition of 1.0~2.5 equiv. of CAN. Orange and green lines correspond to  $\Lambda$  and  $\Delta$  isomers, respectively.

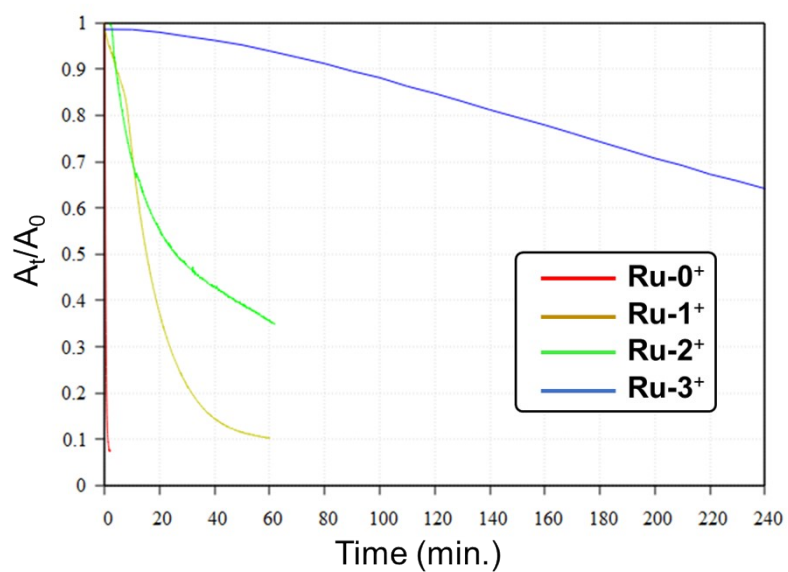

Figure S12 Time-dependent absorption changes of oxidized complexes **Ru-0<sup>+</sup>**, **Ru-1<sup>+</sup>**, **Ru-2<sup>+</sup>**, and **Ru-3<sup>+</sup>**, which were in-situ prepared by adding an acetonitrile solution of CAN to the acetonitrile solution of each complex. The data of **Ru-0<sup>+</sup>**, **Ru-1<sup>+</sup>**, and **Ru-3<sup>+</sup>** were previously reported.<sup>[1]</sup> The relative absorption intensities at 800 nm ( $A_t/A_0$ , where  $A_t$  is the observed absorption at an arbitrary time and  $A_0$  refers to the absorption in the initial state) are plotted against the time after the addition of CAN.

## References

- [1] J. Yoshida, K. Tateyama, H. Yuge, *Dalton Trans.* **2020**, *49*, 2102–2111.
